# Supplementary material
Source: publisher site journal article supplement (https://www.dovepress.com/article/308615)

**Supplemental Figure 1:** Example of measurement-based care patient education poster


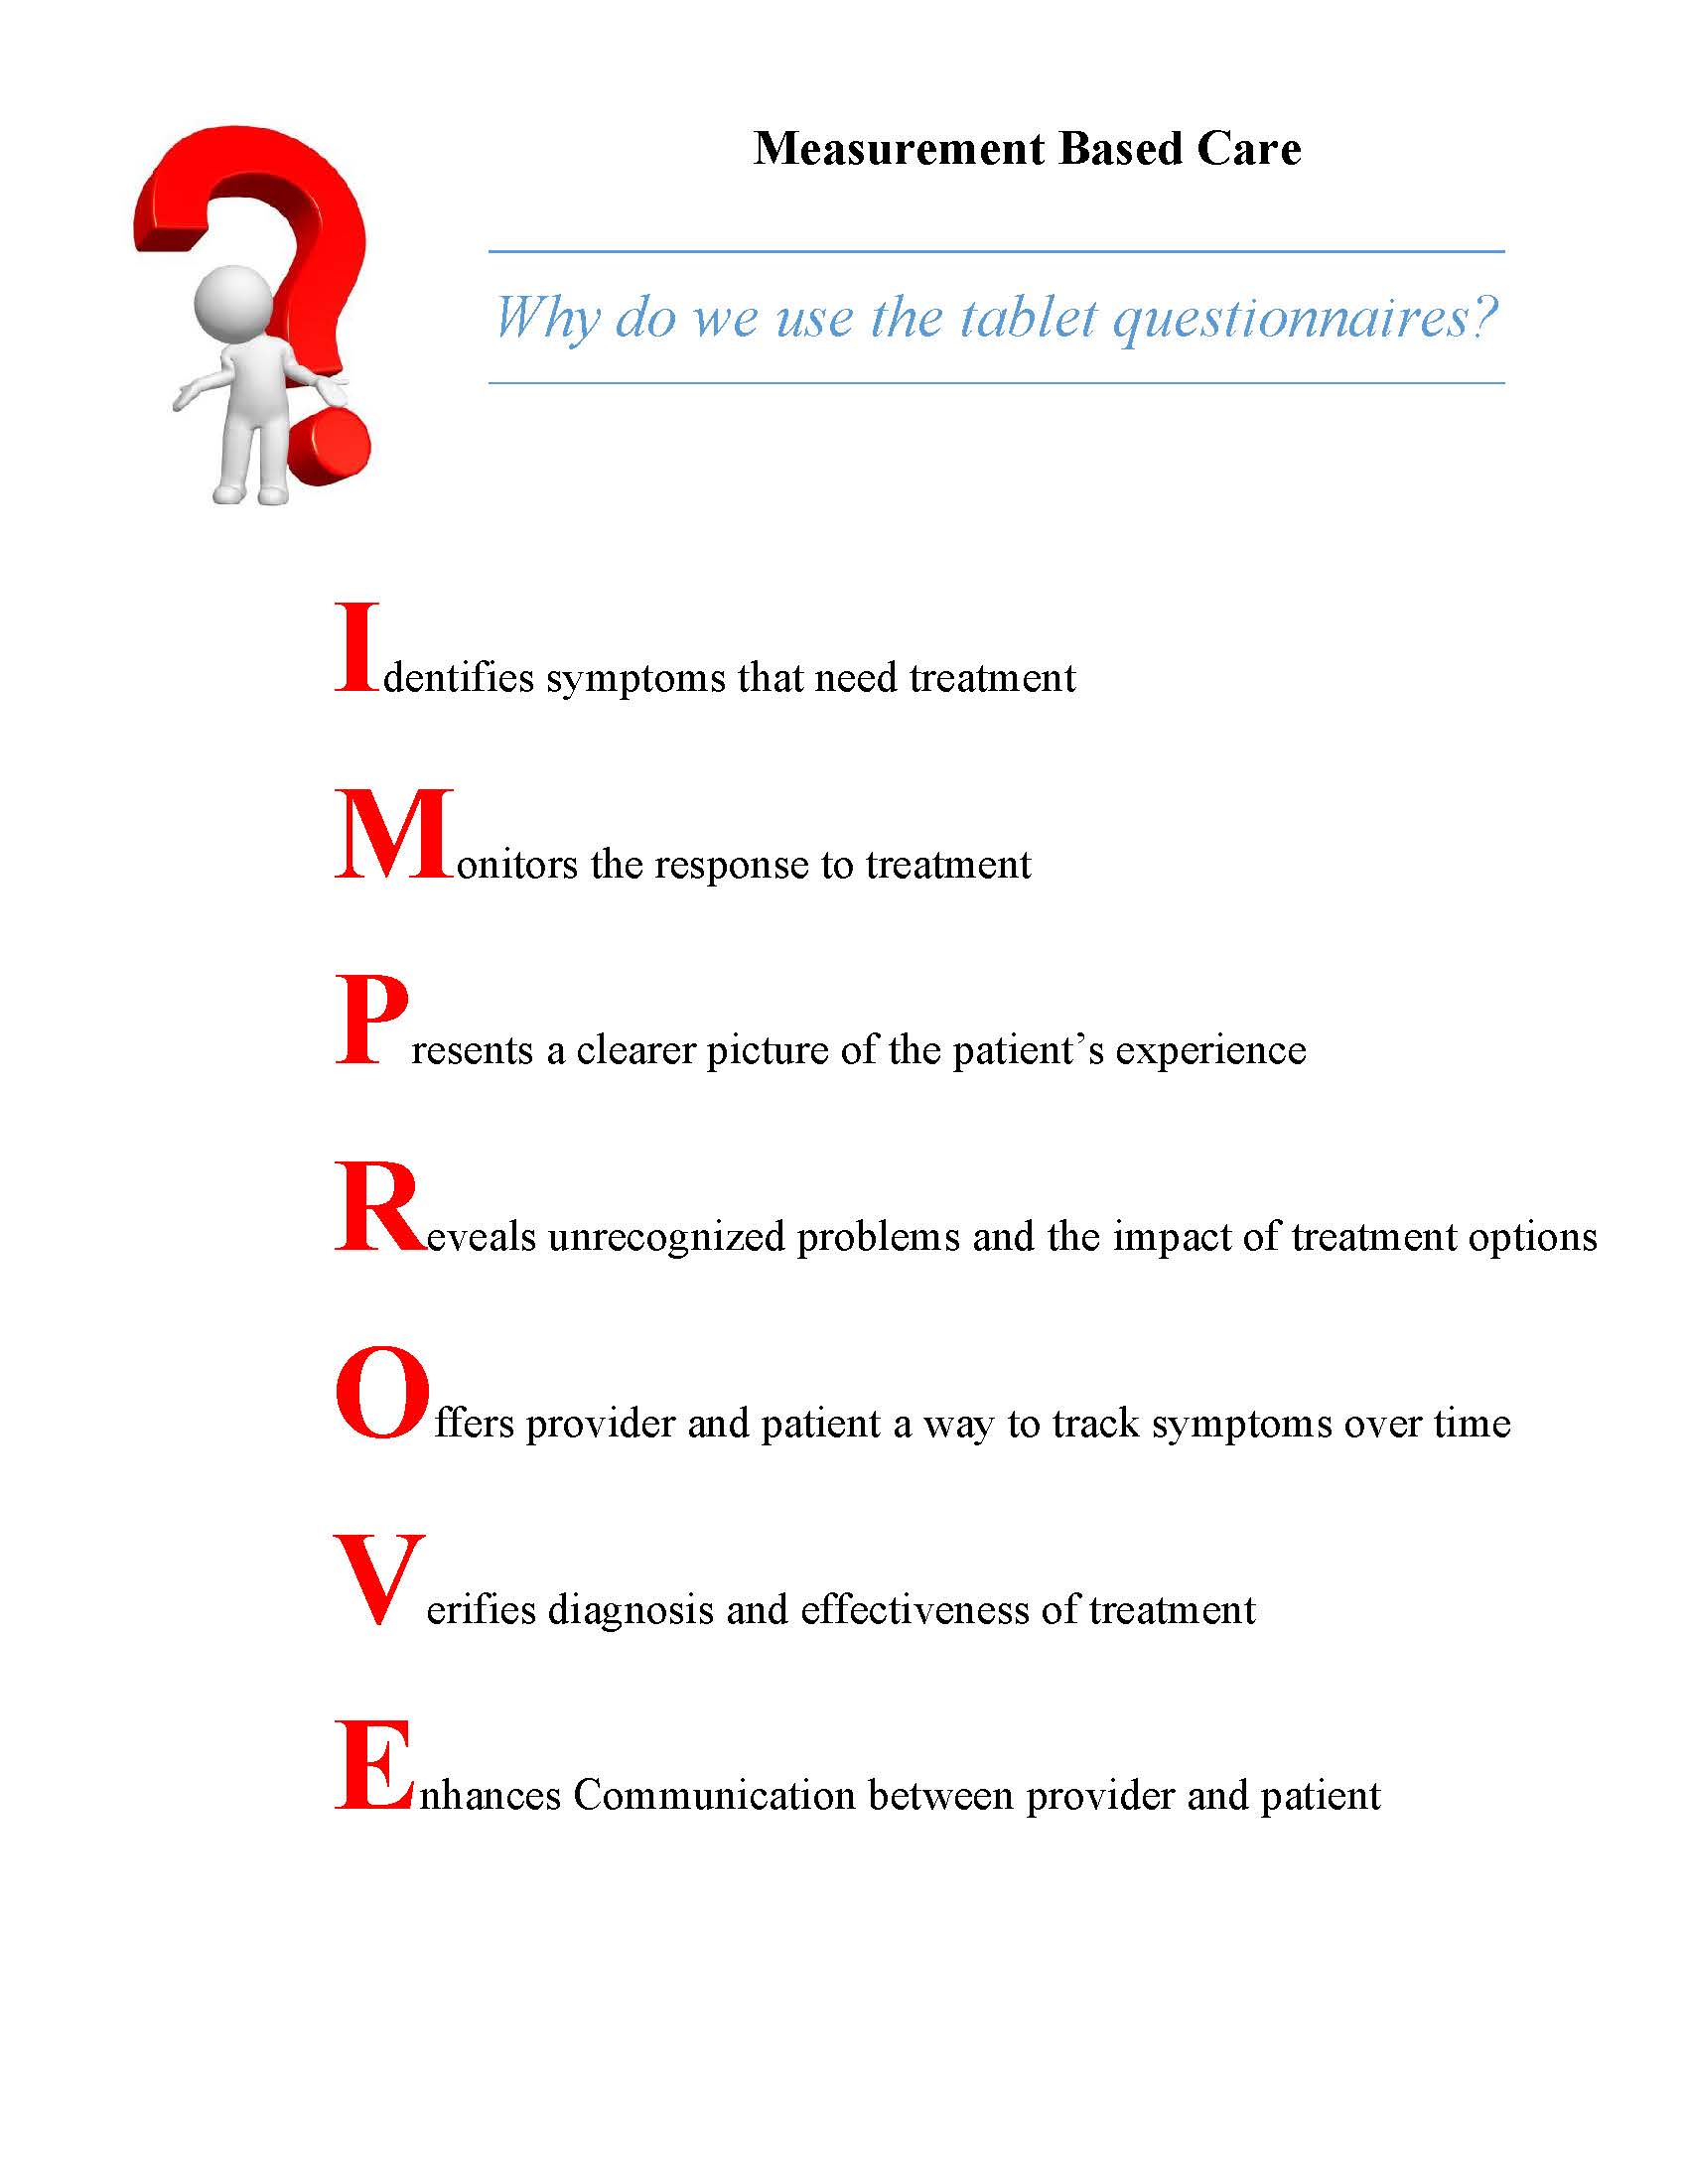

Supplement: Supplementary file 1 [file get_supplementary_file.php]
